# Supplementary material
Source: Springer Nature journal article supplement (https://www.springermedizin.de/resource/supplementary/12885_2013_4221_MOESM1_ESM.pdf/9465802)

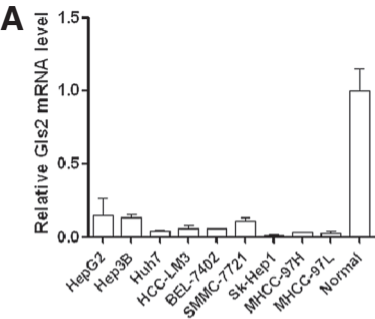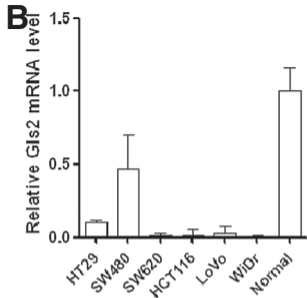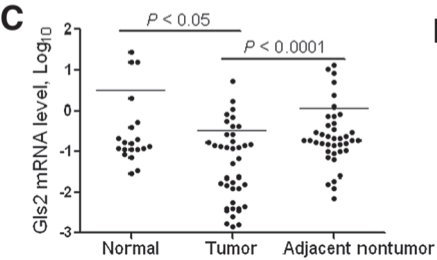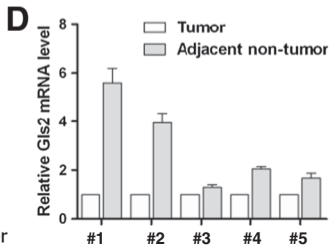

Supplement: MOESM1 [file 9465802]
